# Supplementary material for: Work ability, effort–reward imbalance and disability pension claims
Source: Oxford University Press journal article supplement (doi:10.1093/occmed/kqx164), 2017-10-13
Supplement: kqx164_suppl_supplement_figure_s1.docx [file kqx164_suppl_supplement_figure_s1.docx]

| 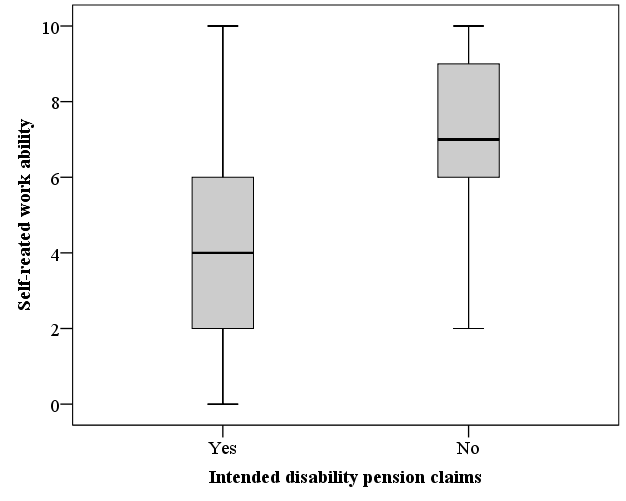 | 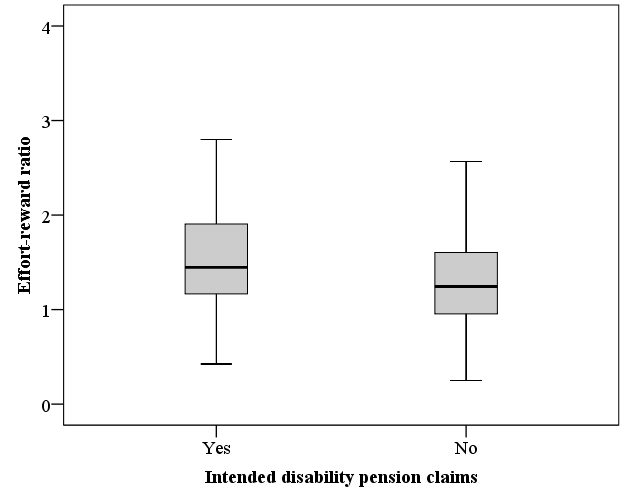 |
| --- | --- |
| 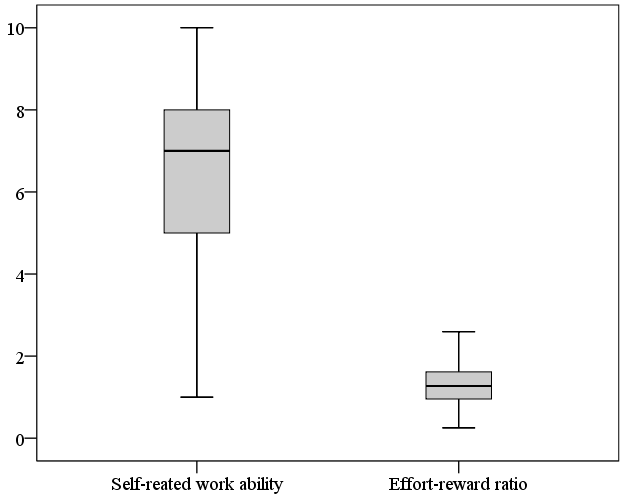 |  |
| **Figure S1.** Box plots depicting upper and lower quartiles for self-rated work ability and effort-reward ratio in relation to intended disability pension claims and self-rated work ability vs. effort reward ratio. | |
