# Supplementary material for: Work ability, effort–reward imbalance and disability pension claims
Source: Oxford University Press journal article supplement (doi:10.1093/occmed/kqx164), 2017-10-13
Supplement: kqx164_suppl_supplement_table_s1.docx [file kqx164_suppl_supplement_table_s1.docx]

# Electronic supplementary file

| **Table S1.** Unstandardized and bias-corrected coefficients, p-values and 95% confidence intervals for the mediation model as displayed in Figure 2 | | | | | |
| --- | --- | --- | --- | --- | --- |
| Path | Function | *b* | 95% CI | *b*BC | 95% CIBC |
| Self-rated work ability |  |  |  |  |  |
| Effort-reward ratio | a | -0.94*** | -1.10; -0.79 | -0.94*** | -1.12; -0.77 |
| Age (5-y steps) |  | -0.19** | -0.29; -0.08 | -0.19** | -0.30; -0.08 |
| Female |  | -0.05 | -0.22; -0.13 | -0.05 | -0.22; 0.13 |
| High educational level |  | 0.02 | -0.20; -0.23 | 0.02 | -0.20; 0.22 |
| No partnership |  | 0.06 | -0.15; 0.27 | 0.06 | -0.15; 0.27 |
| BMI ≥ 30 |  | -0.20 | -0.41; -0.01 | -0.20 | -0.42; 0.02 |
| Sports activity < 2 h/week |  | -0.52*** | -0.70; -0.34 | -0.52*** | -0.70; -0.35 |
| Smoker |  | -0.02 | -0.22; 0.17 | -0.02 | -0.23; 0.17 |
| Low social support |  | -0.93*** | -1.18; -0.68 | -0.93*** | -1.18, -0.66 |
| Moderate social support |  | -0.31** | -0.54; -0.08 | -0.31 | -0.53; -0.08 |
| High physical workload |  | -0.28* | -0.49; -0.06 | -0.27* | -0.50; -0.04 |
| Intended disability pension claims |  |  |  |  |  |
| Self-rated work ability | b | -0.38*** | -0.45; -0.31 | -0.38*** | -0.44; -0.31 |
| Effort–reward ratio |  | 0.04 | -0.25; 0.34 | 0.04 | -0.27; 0.33 |
| Age (5-y steps) |  | 0.37** | 0.15; 0.59 | 0.37** | 0.13; 0.61 |
| Female |  | -0.47* | -0.83; -0.11 | -0.47* | -0.84; -0.10 |
| High educational level |  | -0.73* | -1.29; -0.17 | -0.73* | -1.39; -0.20 |
| No partnership |  | 0.19 | -0.23; 0.61 | 0.19 | -0.27; 0.60 |
| Path | Function | *b* | 95% CI | *b*BC | 95% CIBC |
| BMI ≥ 30 |  | 0.19 | -0.20; 0.58 | 0.19 | -0.25; 0.58 |
| Sports activity < 2 h/week |  | 0.41 | -0.01; 0.83 | 0.41 | -0.00; 0.86 |
| Smoker |  | -0.06 | -0.45; 0.33 | -0.06 | -0.48; 0.35 |
| Low social support |  | 0.16 | -0.38; 0.70 | 0.16 | -0.37; 0.73 |
| Moderate social support |  | -0.08 | -0.61; 0.45 | -0.08 | -0.60; 0.50 |
| High physical workload |  | 0.19 | -0.21; 0.59 | 0.19 | -0.25; 0.61 |
| Effort-reward ratio 🡪 self-rated work ability 🡪 intended disability pension claims | indirect effect  a * b | 0.36*** | 0.27; 0.45 | 0.36*** | 0.27; 0.45 |
| Effort-reward ratio 🡪 intended disability pension claims | direct effect  c’ | 0.04 | -0.25; 0.34 | 0.04 | -0.27; 0.33 |
| Specific indirect effect + direct effect | total effect  a * b + c’ | 0.40** | 0.11; 0.69 | 0.40** | 0.09; 0.69 |
| **P* <0.05.  ***P* <0.01.  ****P* <0.001.  BC = bias-corrected; Bootstrapping resampling was conducted with 5,000 draws.  Path a represents the path from the effort-reward ratio to self-rated work ability.  Path b represents the path from self-rated work ability to intended disability pension claims.  Path c’ represents the path from the effort-reward ratio to intended disability pension claims. | | | | | |
